# Supplementary material for: Excited State Structural Evolution of a GFP Single-Site Mutant Tracked by Tunable Femtosecond-Stimulated Raman Spectroscopy
Source: Molecules. 2018 Sep 1;23(9):2226. doi: 10.3390/molecules23092226 (PMC6225354; doi:10.3390/molecules23092226)
Supplement: Supplementary file 1 [file molecules-23-02226-s001.pdf]

**Supplementary Materials (SM) for:**

Excited State Structural Evolution of a GFP Single-Site Mutant  
Tracked by Tunable Femtosecond Stimulated Raman Spectroscopy

Longteng Tang<sup>1</sup>, Liangdong Zhu<sup>1</sup>, Miles A. Taylor<sup>1</sup>, Yanli Wang<sup>1</sup>, S. James  
Remington<sup>2</sup> and Chong Fang<sup>1,\*</sup>

<sup>1</sup>Department of Chemistry, Oregon State University, Corvallis, Oregon 97331, USA

<sup>2</sup>Institute of Molecular Biology and Department of Physics, University of Oregon,  
Eugene, Oregon 97403, USA

Corresponding Author

\*E-mail: [Chong.Fang@oregonstate.edu](mailto:Chong.Fang@oregonstate.edu). Phone: 541-737-6704.

*This PDF file includes **SM Figures S1-S3** on page S2-S4 and **SM References** on page S5.*

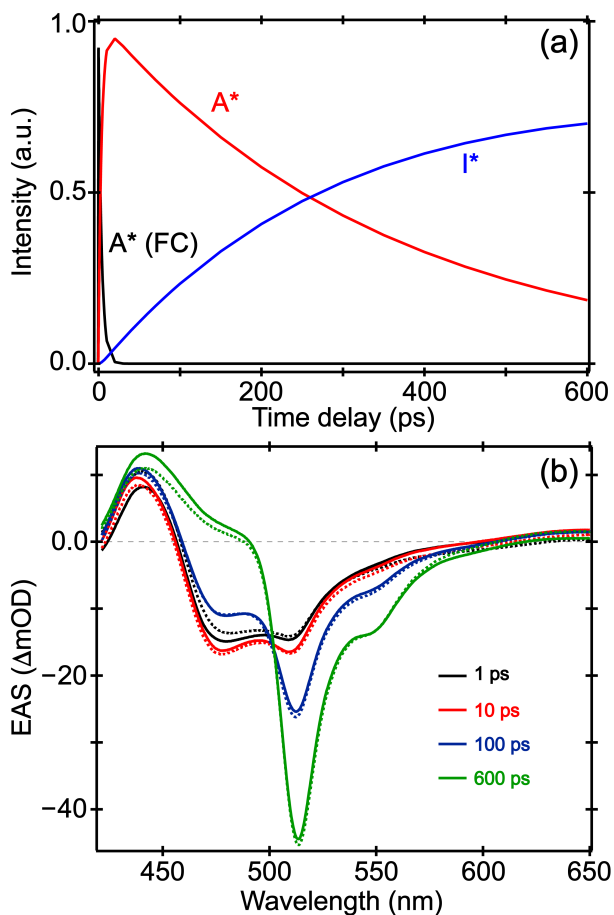

**Figure S1.** Global analysis of the fs-TA spectra of GFP-S205V after 400 nm photoexcitation. (a) Plot of the dynamics of three components from a sequential kinetic model, which consists of the A\* (Franck-Condon region or FC, black)  $\rightarrow$  A\* (likely with charge-transfer character, red) [1,2]  $\rightarrow$  I\* (deprotonated chromophore in an unrelaxed environment, blue) speciation in the electronic excited state. The corresponding evolution-associated spectra (EAS) are displayed in Figure 2b (see main text). (b) Kinetic data traces (dotted curves) are overlaid with the global fits (solid curves) using Glotaran software [3] at representative time delay points of 1 ps (black), 10 ps (red), 100 ps (blue), and 600 ps (green) after electronic excitation. The time-dependent fitting traces largely match the experimental traces across the detection wavelength region, indicating that the kinetic model well approximates the fs-TA data from the ps to hundreds of ps time scale.

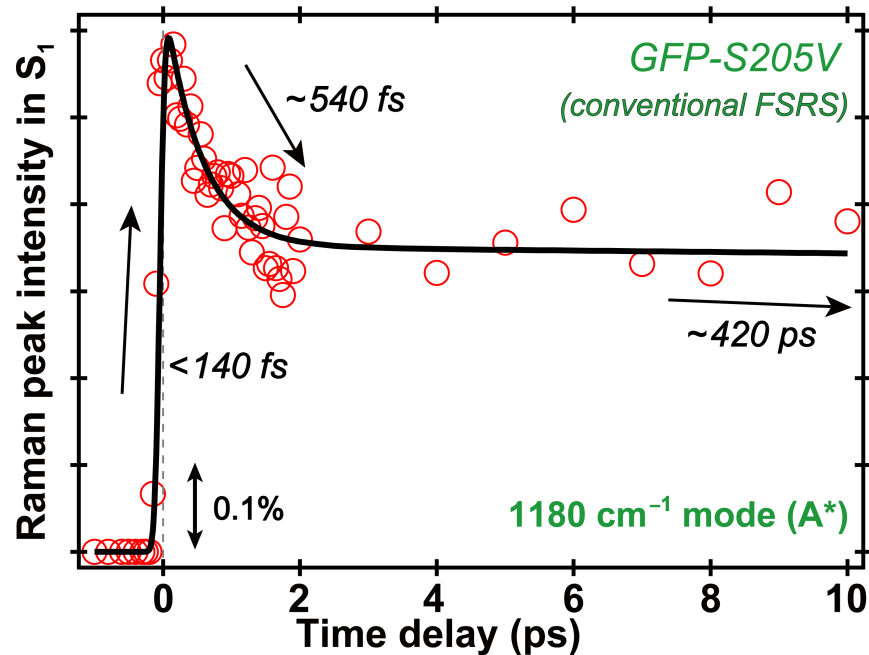

**Figure S2.** Excited state intensity dynamics of the  $1180\text{ cm}^{-1}$  mode of the GFP-S205V protein chromophore upon 400 nm photoexcitation (including negative time points) using conventional FSRS, wherein the Raman pump is at 801 nm. The time window from  $-1\text{ ps}$  to  $10\text{ ps}$  is shown, and the excited state Raman mode intensity data points (red circles) are overlaid with the least-squares multi-exponential fits (black curve). The time constant of the signal rise component near time zero (gray dashed line) is smaller than the cross-correlation time of the setup ( $140\text{ fs}$ , see Section 2.4 in main text). The semilogarithmic plot for a time window up to  $600\text{ ps}$  can be seen in Figure 4b (main text), which better shows the long decay time constant of  $420\text{ ps}$ .

Notably, the lack of clear spectral oscillations (quantum beats) within the initial  $\sim 2\text{ ps}$  differs from the wild-type GFP [4], which could be due to the dramatically altered ESPT chain inside the GFP-S205V mutant [5]. Besides suitable resonance conditions, the fs Raman observation of coherent mode intensity or frequency oscillations depends on the intricate interplay between the photoexcited chromophore and its local environment [6,7].

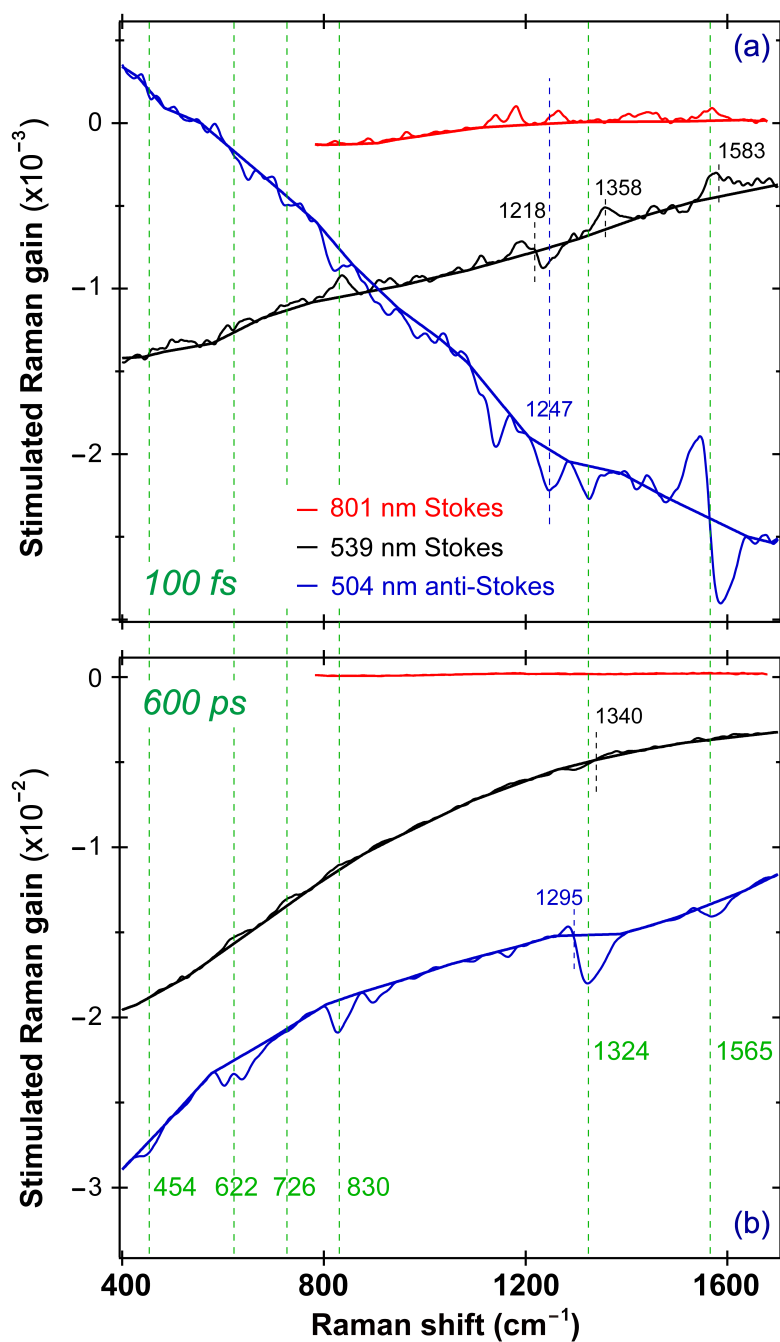

**Figure S3.** Raw experimental excited state FSRS spectra of GFP-S205V with Raman pump at 801 nm (red) in Stokes FSRS, 539 nm (black) in Stokes FSRS, and 504 nm (blue) in anti-Stokes FSRS at (a) 100 fs and (b) 600 ps time delay after 400 nm photoexcitation. The spline baselines are shown in color-coded solid curves. The vertical green, blue, and black dashed lines highlight the Raman marker bands shown in Figures 4, 5, 6, and 7 (main text).

## **SM References**

1. Chen, C.; Liu, W.; Baranov, M.S.; Baleeva, N.S.; Yampolsky, I.V.; Zhu, L.; Wang, Y.; Shamir, A.; Solntsev, K.M.; Fang, C. Unveiling structural motions of a highly fluorescent superphotoacid by locking and fluorinating the GFP chromophore in solution. *J. Phys. Chem. Lett.* **2017**, *8*, 5921-5928.
2. Tang, L.; Wang, Y.; Zhu, L.; Kallio, K.; Remington, S.J.; Fang, C. Photoinduced proton transfer inside an engineered green fluorescent protein: A stepwise-concerted-hybrid reaction. *Phys. Chem. Chem. Phys.* **2018**, *20*, 12517-12526.
3. Snellenburg, J.J.; Liptonok, S.; Seger, R.; Mullen, K.M.; van Stokkum, I.H.M. Glotaran: A Java-based graphical user interface for the R package TIMP. *J. Stat. Softw.* **2012**, *49*, 22.
4. Fang, C.; Frontiera, R.R.; Tran, R.; Mathies, R.A. Mapping GFP structure evolution during proton transfer with femtosecond Raman spectroscopy. *Nature* **2009**, *462*, 200-204.
5. Shu, X.; Leiderman, P.; Gepshtein, R.; Smith, N.R.; Kallio, K.; Huppert, D.; Remington, S.J. An alternative excited-state proton transfer pathway in green fluorescent protein variant S205V. *Protein Sci.* **2007**, *16*, 2703-2710.
6. Hoffman, D.P.; Mathies, R.A. Femtosecond stimulated Raman exposes the role of vibrational coherence in condensed-phase photoreactivity. *Acc. Chem. Res.* **2016**, *49*, 616-625.
7. Fang, C.; Tang, L.; Oscar, B.G.; Chen, C. Capturing structural snapshots during photochemical reactions with ultrafast Raman spectroscopy: From materials transformation to biosensor responses. *J. Phys. Chem. Lett.* **2018**, *9*, 3253-3263.
